# Supplementary material for: Functionalization of reduced graphene oxide with axially-coordinated metal-porphyrins: facile syntheses and temporally-dependent nonlinear optical properties
Source: Royal Society of Chemistry journal article supplement (doi:10.1039/c5qi00209e), 2015-12-09
Supplement: c5qi00209e1.pdf [file c5qi00209e1.pdf]

## Electronic Supplementary Information

Functionalization of reduced graphene oxide with axially-coordinated  
metal-porphyrins: facile syntheses and temporally-dependent optical  
properties

Aijian Wang, Jingbao Song, Ding Jia, Wang Yu, Lingliang Long, Yinglin Song,  
Marie P. Cifuentes, Mark G. Humphrey, Long Zhang, Jianda Shao, and Chi Zhang\*

**Table S1.** Two-photon absorption coefficients at 532 nm.

|             | $\beta$ (m/W) (4 ns)   | $\beta$ (m/W) (21 ps)  |
|-------------|------------------------|------------------------|
| RGO         | $1.05 \times 10^{-10}$ | $-2.0 \times 10^{-13}$ |
| SnTPP       | $0.95 \times 10^{-10}$ | $2.8 \times 10^{-13}$  |
| RGO-SnTPP 1 | $3.5 \times 10^{-10}$  | $-3.5 \times 10^{-13}$ |
| RGO-SnTPP 2 | $6.2 \times 10^{-10}$  | $-7.0 \times 10^{-13}$ |
| RGO/SnTPP   | $1.5 \times 10^{-10}$  | -                      |

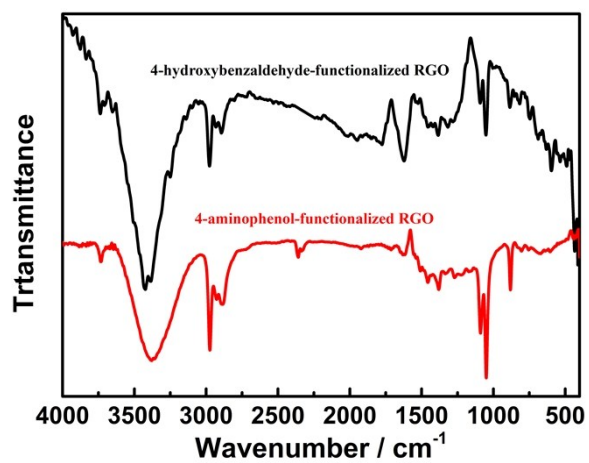

**Figure S1.** FTIR spectra of 4-hydroxybenzaldehyde-functionalized RGO and 4-aminophenol-functionalized RGO nanohybrids.

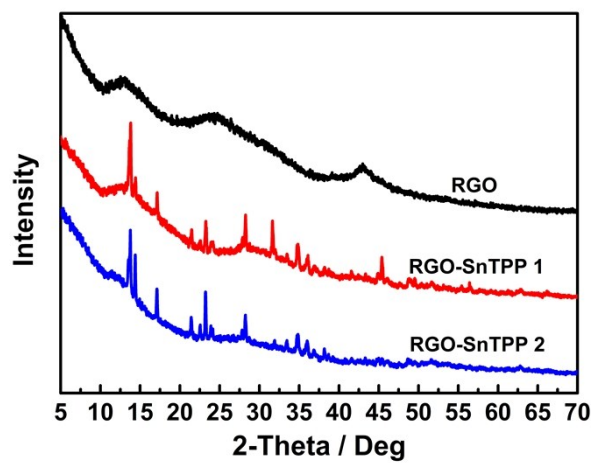

**Figure S2.** XRD patterns of RGO, RGO-SnTPP 1 and RGO-SnTPP 2.

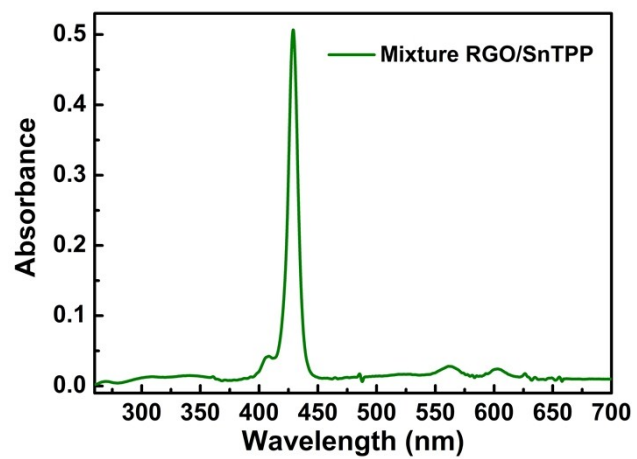

**Figure S3.** Ground-state absorption spectrum of blended RGO and SnTPP.

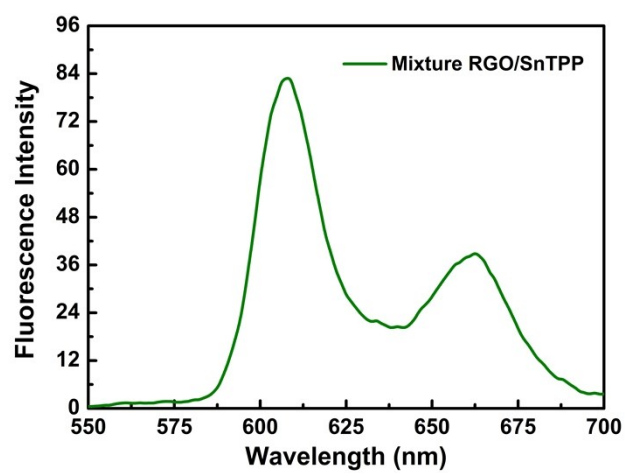

**Figure S4.** Fluorescence spectrum of blended RGO and SnTPP.

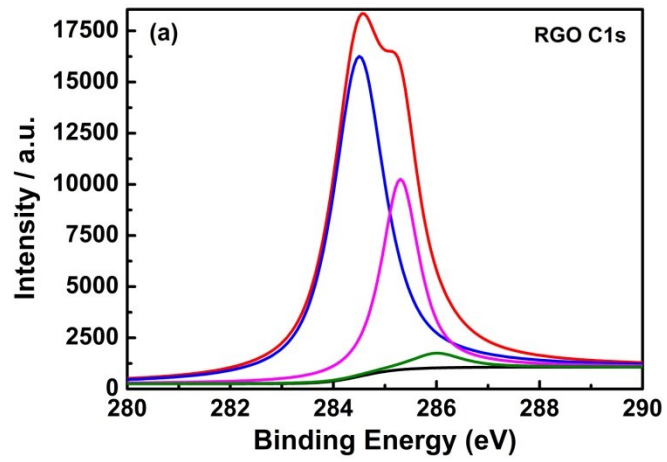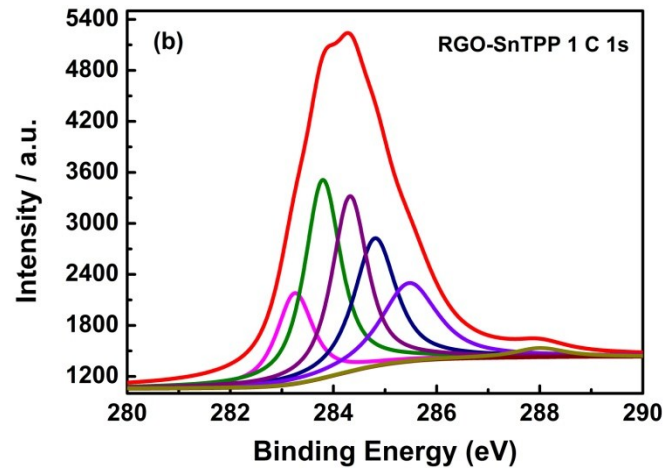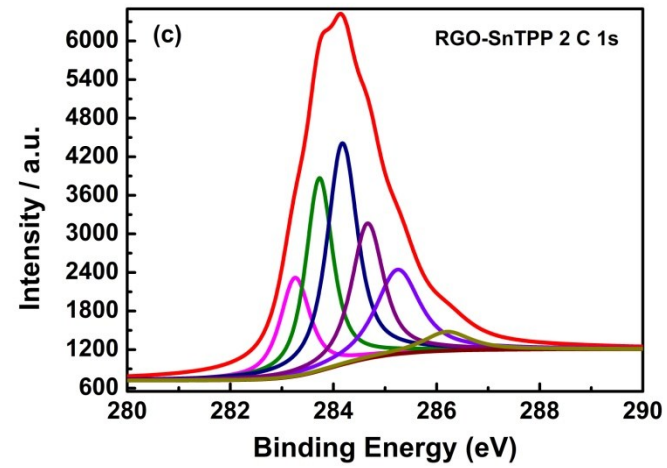

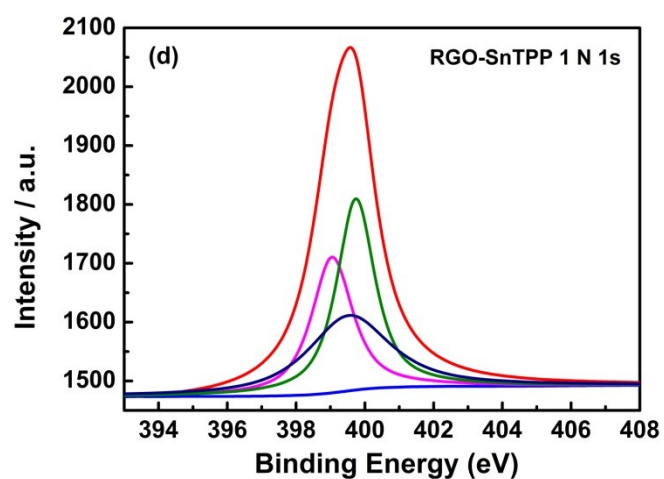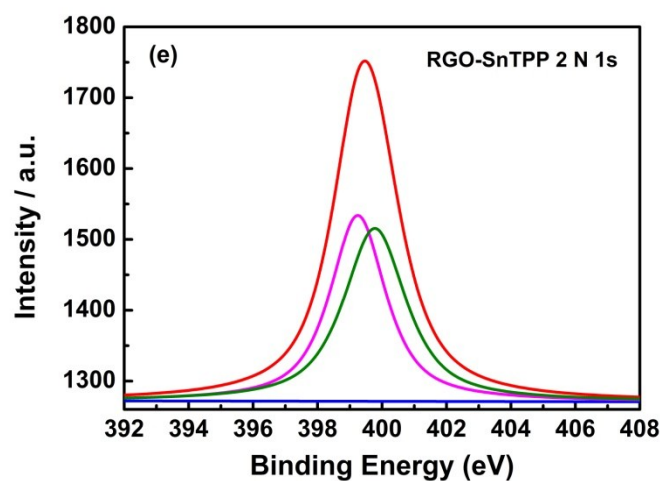

**Figure S5.** Deconvoluted experimental XPS spectra of (a) C1s (RGO), (b) C1s (RGO-SnTPP 1), (c) C1s (RGO-SnTPP 2), (d) N1s (RGO-SnTPP 1), and (e) N1s (RGO-SnTPP 2).



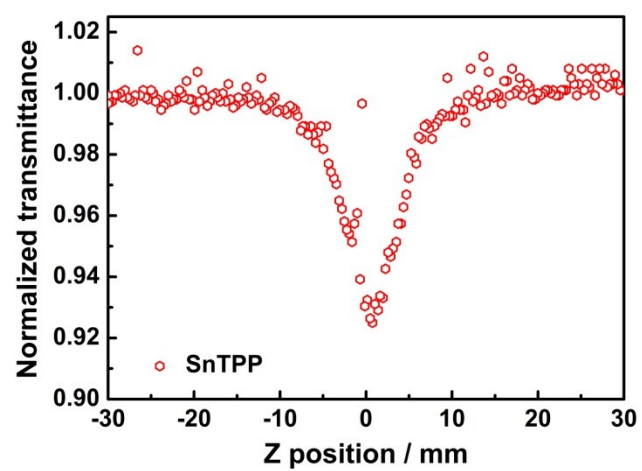

**Figure S6.** Open-aperture Z-scan traces of SnTPP in DMSO, obtained under 21 ps, 532 nm laser excitation.

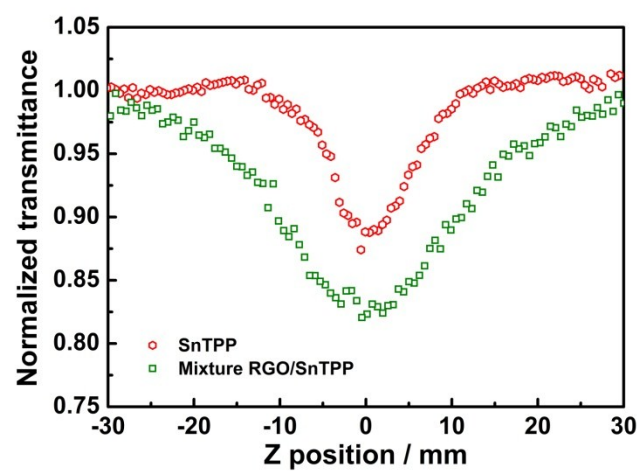

**Figure S7.** Open-aperture Z-scan traces of SnTPP and blended RGO and SnTPP suspension in DMSO, obtained under 4 ns, 532 nm laser excitation.
